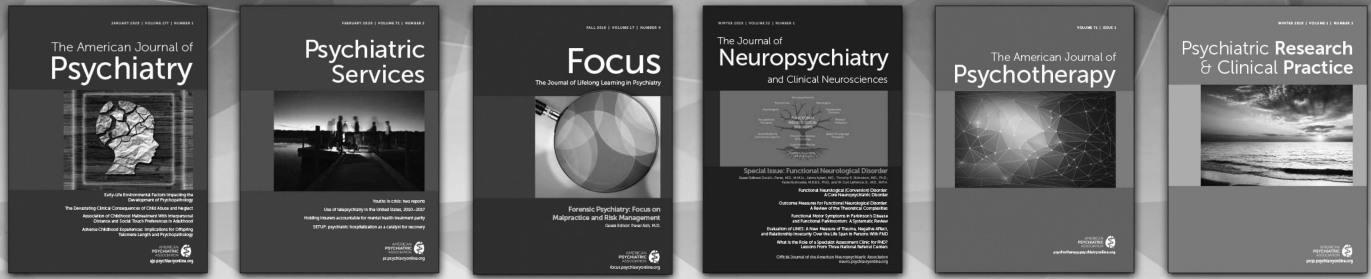

## More Ways to Engage Beyond Reading a Page

The journals of American Psychiatric Association Publishing are leading contributors to the literature. Our articles advance understanding of all aspects of mental and behavioral disorders and their treatment. With close to 10 million page views of journal content annually, APA Publishing's journals reach audiences at more than 2,000 U.S. and international institutions, a figure that includes nearly 100% of U.S. medical schools and hospitals.

APA Publishing is committed to discovery of journal articles and offers several ways to access journal content on the **PsychiatryOnline** knowledge portal, ensuring that practitioners can keep up with the latest findings in the manner they prefer.

### PODCASTS

Each episode brings you an in-depth look at articles featured in that month's issue. Lively discussion and wide-ranging interviews with authors cover the background, rationale, main findings, and future implications of the research.

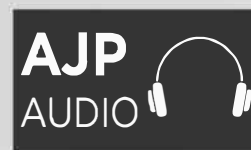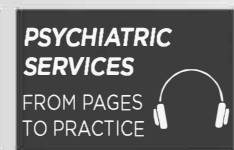

### AUDIO SYNOPSES

Prepared in collaboration with *Psychiatric News*, these audio synopses accompany the online article and can be accessed as a skill through Amazon's Alexa app.

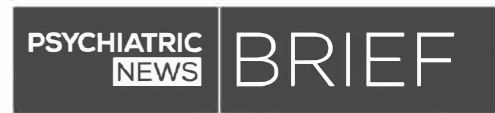

### CURATED COLLECTIONS

These collections of recent and seminal research in a given area can be used as a launch point for authors conducting literature reviews and for educators working on course content. Curated **Editor's Choice** collections from *Psychiatric Services* are currently available.

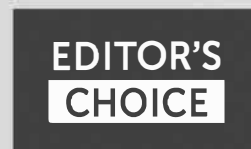

### ALERTS

Keep up with all of the latest research being published by signing up to receive **Publication Alerts** and following on Twitter @APAPubJournals.

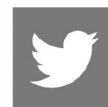

### GET INVOLVED!

We also encourage active contributions to our journals. Submit your research for publication consideration at one of our peer-reviewed titles. Even if you don't have a paper at present, visit our submission site and set up your reviewer account so that you have a say in future contributions to the literature.

[psychiatryonline.org/journals](http://psychiatryonline.org/journals)

Subscribe @ [www.appi.org](http://www.appi.org) • Email: [appi@psych.org](mailto:appi@psych.org) • Toll Free: 1-800-368-5777

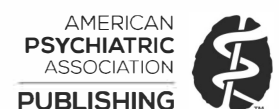

Searching for  
the perfect  
psychiatric  
career?

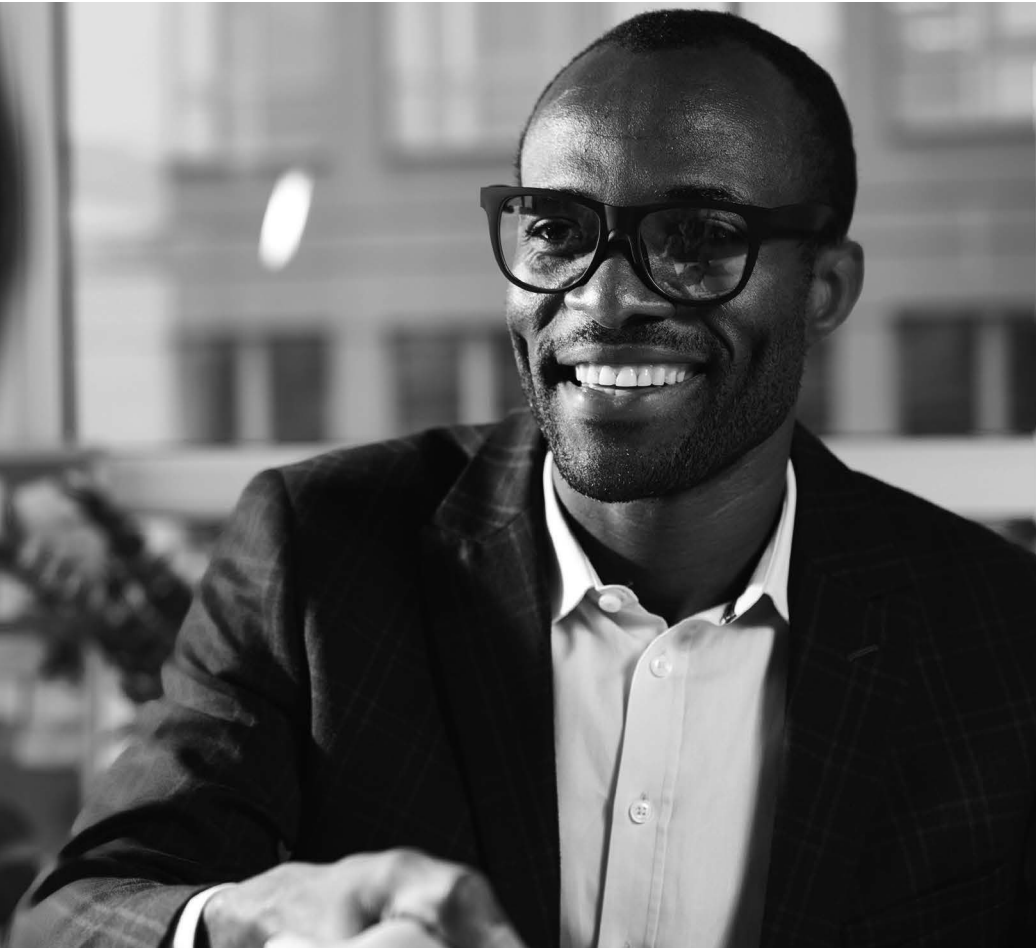

## Let APA JobCentral help!

### Manage Your Career

- Browse hundreds of active job listings!
- Create an account to save jobs, store multiple resumes and cover letters and communicate with employers through our internal messaging system.
- Set up multiple job alerts specifying your skills, interests and location to receive e-mails when employers post jobs that match your criteria.

### Recruit for Open Positions

- Post your job in front of thousands of highly qualified psychiatrists.
- Cross promote your job listing in Psychiatric News.
- Search the anonymous resume database to find your ideal candidate.

AMERICAN  
PSYCHIATRIC  
ASSOCIATION

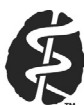

**JOBCENTRAL**  
The Career Hub for Psychiatry

[jobs.psychiatry.org](http://jobs.psychiatry.org)

|                                                                                                                                                                                                                                                                                                                                                                                                                                                                                                                                                                         |                                                  |                                           |                                                             |
|-------------------------------------------------------------------------------------------------------------------------------------------------------------------------------------------------------------------------------------------------------------------------------------------------------------------------------------------------------------------------------------------------------------------------------------------------------------------------------------------------------------------------------------------------------------------------|--------------------------------------------------|-------------------------------------------|-------------------------------------------------------------|
| 1. Publication Title<br>AMERICAN PSYCHIATRIC ASSOCIATION/<br>JOURNAL OF NEUROPSYCHIATRY AND<br>CLINICAL NEUROSCIENCES (THE)                                                                                                                                                                                                                                                                                                                                                                                                                                             | 2. Publication Number<br>4241                    | ISSN<br>8950172                           | 3. Filing Date<br>09/27/2021                                |
| 4. Issue Frequency<br>QUARTERLY                                                                                                                                                                                                                                                                                                                                                                                                                                                                                                                                         | 5. Number of Issues Published Annually<br>4      | 6. Annual Subscription Price<br>\$ 309.00 |                                                             |
| 7. Complete Mailing Address of Known Office of Publication<br>800 Maine Ave SW, Suite 900<br>Washington, DC 20024-2812                                                                                                                                                                                                                                                                                                                                                                                                                                                  |                                                  |                                           | Contact Person<br>BRIAN COLE<br>Telephone<br>(202) 459-9750 |
| 8. Complete Mailing Address of Headquarters or General Business Office of Publisher<br>800 MAINE AVE SW STE 900<br>WASHINGTON, DC 20024-2812                                                                                                                                                                                                                                                                                                                                                                                                                            |                                                  |                                           |                                                             |
| 9. Full Names and Complete Mailing Addresses of Publisher, Editor, and Managing Editor                                                                                                                                                                                                                                                                                                                                                                                                                                                                                  |                                                  |                                           |                                                             |
| Publisher (Name and complete mailing address)<br>John McDuffie<br>800 Main Avenue, Suite 900<br>Washington, DC 20024                                                                                                                                                                                                                                                                                                                                                                                                                                                    |                                                  |                                           |                                                             |
| Editor (Name and complete mailing address)<br>David Arciniegas, M.D.<br>800 Main Avenue, Suite 900<br>Washington, DC 20024                                                                                                                                                                                                                                                                                                                                                                                                                                              |                                                  |                                           |                                                             |
| Managing Editor (Name and complete mailing address)<br>Dennise S. Jackson<br>800 Main Avenue, Suite 900<br>Washington, DC 20024                                                                                                                                                                                                                                                                                                                                                                                                                                         |                                                  |                                           |                                                             |
| 10. Owner (Do not leave blank. If the publication is owned by a corporation, give the name and address of the corporation immediately followed by the names and addresses of all stockholders owning or holding 1 percent or more of the total amount of stock. If not owned by a corporation, give names and addresses of the individual owners. If owned by a partnership or other unincorporated firm, give its name and address as well as those of each individual owner. If the publication is published by a nonprofit organization, give its name and address.) |                                                  |                                           |                                                             |
| Full Name                                                                                                                                                                                                                                                                                                                                                                                                                                                                                                                                                               | Complete Mailing Address                         |                                           |                                                             |
| American Psychiatric Assoc.                                                                                                                                                                                                                                                                                                                                                                                                                                                                                                                                             | 800 Main Avenue, Suite 900, Washington, DC 20024 |                                           |                                                             |
| 11. Known Bondholders, Mortgagees, and Other Security Holders Owning or Holding 1 Percent or More of Total Amount of Bonds, Mortgages, or Other Securities. If none, check box <input checked="" type="checkbox"/> None                                                                                                                                                                                                                                                                                                                                                 |                                                  |                                           |                                                             |
| Full Name                                                                                                                                                                                                                                                                                                                                                                                                                                                                                                                                                               | Complete Mailing Address                         |                                           |                                                             |
| 12. Tax Status (For completion by nonprofit organizations authorized to mail at nonprofit rates)<br>The purpose, function, and nonprofit status of this organization and the exempt status for federal income tax purposes:<br><input checked="" type="checkbox"/> Has Not Changed During Preceding 12 Months<br><input type="checkbox"/> Has Changed During Preceding 12 Months (Publisher must submit explanation of change with this statement)                                                                                                                      |                                                  |                                           |                                                             |

|                                                                                                                                                                                                                                                                                                                                                        |                                                                                                                                                                    |                                                             |                                                                |
|--------------------------------------------------------------------------------------------------------------------------------------------------------------------------------------------------------------------------------------------------------------------------------------------------------------------------------------------------------|--------------------------------------------------------------------------------------------------------------------------------------------------------------------|-------------------------------------------------------------|----------------------------------------------------------------|
| 13. Publication Title<br>AMERICAN PSYCHIATRIC ASSOCIATION/JOURNAL OF<br>NEUROPSYCHIATRY AND CLINICAL NEUROSCIENCES (THE)                                                                                                                                                                                                                               |                                                                                                                                                                    | 14. Issue Date for Circulation Data Below<br>07/01/2021     |                                                                |
| 15. Extend and Nature of Circulation                                                                                                                                                                                                                                                                                                                   |                                                                                                                                                                    | Average No. Copies Each Issue<br>During Preceding 12 Months | No. Copies of Single Issue<br>Published Nearest to Filing Date |
| a. Total Numbers of Copies (Net press run)                                                                                                                                                                                                                                                                                                             |                                                                                                                                                                    | 601                                                         | 596                                                            |
| b. Paid<br>Circulation<br>(By Mail<br>and<br>Outside<br>the Mail)                                                                                                                                                                                                                                                                                      | (1) Mailed Outside County Paid Subscriptions Stated on PS Form 3541 (include paid distribution above nominal rate, advertiser's proof copies, and exchange copies) | 409                                                         | 410                                                            |
|                                                                                                                                                                                                                                                                                                                                                        | (2) Mailed In-County Paid Subscriptions Stated on PS Form 3541 (include paid distribution above nominal rate, advertiser's proof copies, and exchange copies)      | 0                                                           | 0                                                              |
|                                                                                                                                                                                                                                                                                                                                                        | (3) Paid Distribution Outside the Mails including Sales Through Dealers and Carriers, Street Vendors, Counter Sales, and Other Paid Distribution Outside USPS      | 0                                                           | 0                                                              |
|                                                                                                                                                                                                                                                                                                                                                        | (4) Paid Distribution by Other Classes of Mail Through the USPS (e.g. First-Class Mail)                                                                            | 0                                                           | 0                                                              |
| c. Total Paid Distribution (Sum of 15b (1), (2), (3), (4))                                                                                                                                                                                                                                                                                             |                                                                                                                                                                    | 409                                                         | 410                                                            |
| d. Free or<br>Nominal<br>Rate<br>Distribution<br>(By Mail<br>and<br>Outside<br>the Mail)                                                                                                                                                                                                                                                               | (1) Free or Nominal Rate Outside County Copies included on PS Form 3541                                                                                            | 0                                                           | 0                                                              |
|                                                                                                                                                                                                                                                                                                                                                        | (2) Free or Nominal Rate In-County Copies included on PS Form 3541                                                                                                 | 0                                                           | 0                                                              |
|                                                                                                                                                                                                                                                                                                                                                        | (3) Free or Nominal Rate Copies Mailed at Other Classes Through the USPS (e.g. First-Class Mail)                                                                   | 0                                                           | 0                                                              |
|                                                                                                                                                                                                                                                                                                                                                        | (4) Free or Nominal Rate Distribution Outside the Mail (Carriers or other means)                                                                                   | 25                                                          | 23                                                             |
| e. Total Free or Nominal Rate Distribution (Sum of 15d (1), (2), (3), (4))                                                                                                                                                                                                                                                                             |                                                                                                                                                                    | 25                                                          | 23                                                             |
| f. Total Distribution (Sum of 15c and 15e)                                                                                                                                                                                                                                                                                                             |                                                                                                                                                                    | 434                                                         | 433                                                            |
| g. Copies not Distributed                                                                                                                                                                                                                                                                                                                              |                                                                                                                                                                    | 0                                                           | 0                                                              |
| h. Total (Sum of 15f and 15g)                                                                                                                                                                                                                                                                                                                          |                                                                                                                                                                    | 434                                                         | 433                                                            |
| i. Percent Paid ((15c / 15f) times 100)                                                                                                                                                                                                                                                                                                                |                                                                                                                                                                    | 94.24 %                                                     | 94.69 %                                                        |
| 16. If total circulation includes electronic copies, report that circulation on lines below.                                                                                                                                                                                                                                                           |                                                                                                                                                                    |                                                             |                                                                |
| a. Paid Electronic Copies                                                                                                                                                                                                                                                                                                                              |                                                                                                                                                                    | 0                                                           | 0                                                              |
| b. Total Paid Print Copies (Line 15c) + Paid Electronic Copies                                                                                                                                                                                                                                                                                         |                                                                                                                                                                    | 0                                                           | 0                                                              |
| c. Total Print Distribution (Line 15f) + Paid Electronic Copies                                                                                                                                                                                                                                                                                        |                                                                                                                                                                    | 0                                                           | 0                                                              |
| d. Percent Paid (Both Print and Electronic Copies)                                                                                                                                                                                                                                                                                                     |                                                                                                                                                                    | 0.00 %                                                      | 0.00 %                                                         |
| <input type="checkbox"/> I certify that 50% of all my distributed copies (Electronic and Print) are paid above a nominal price.                                                                                                                                                                                                                        |                                                                                                                                                                    |                                                             |                                                                |
| 17. Publication of Statement of Ownership<br><input checked="" type="checkbox"/> If the publication is a general publication, publication of this statement is required. Will be printed in the 11/01/2021 issue of this publication. <input type="checkbox"/> Publication not required.                                                               |                                                                                                                                                                    |                                                             |                                                                |
| 18. Signature and Title of Editor, Publisher, Business Manager, or Owner                                                                                                                                                                                                                                                                               |                                                                                                                                                                    | Title                                                       | Date                                                           |
| Debra Eubanks                                                                                                                                                                                                                                                                                                                                          |                                                                                                                                                                    | Director, Publishing Business Operations                    | 09/27/2021 16:15:23 PM                                         |
| I certify that all information furnished on this form is true and complete. I understand that anyone who furnishes false or misleading information on this form or who omits material or information requested on the form may be subject to criminal sanctions (including fines and imprisonment) and/or civil sanctions (including civil penalties). |                                                                                                                                                                    |                                                             |                                                                |

## Enable Psychiatric News Brief

With the American Psychiatric Association's new flash briefing, *Psychiatric News Brief*, you can now listen to synopses of curated articles from *Psychiatric News*. Simply enable this skill and you can listen anytime you choose throughout your day by just saying "Alexa, what's my flash briefing" or "Alexa, tell me what's new".

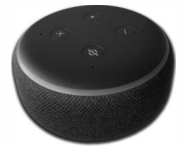

Flash briefing is a customizable Amazon skill that includes updates from your favorite content services. When you say, "Alexa, what's my flash briefing?" or "Alexa, what's the news," you'll hear updates from any organization that you have enabled.

Go to [psychnews.psychiatryonline.org/alexa](https://psychnews.psychiatryonline.org/alexa) to sign up now!

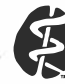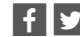

## The American Psychiatric Association Publishing Textbook of Schizophrenia, Second Edition

Edited by Jeffrey A. Lieberman, M.D.,  
T. Scott Stroup, M.D., M.P.H.,  
Diana O. Perkins, M.D., M.P.H., and  
Lisa B. Dixon, M.D., M.P.H.

Designed to bring the reader up to date on the latest research, this new edition represents a complete overhaul of the previous text, with a new structure, new chapters, and new contributors. *The American Psychiatric Association Publishing Textbook of Schizophrenia* furnishes evidence-based and cutting-edge knowledge for the next generation of students, trainees, and clinicians.

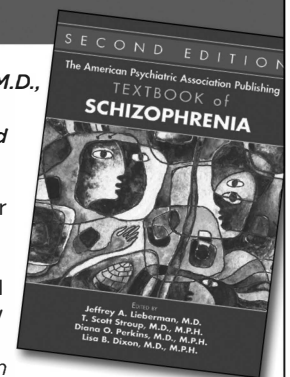

2020 • 336 pages • ISBN 978-1-61537-172-3 • Hardcover  
\$140.00 • Item #37172

2020 • 336 pages • ISBN 978-1-61537-291-1 • eBook  
\$112.00 • Item #37291

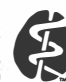

Source: https://psychiatryonline.org/doi/suppl/10.1176/jnp.2021.33.issue-4/suppl_file/back.pdf
