FALL 2021 | VOLUME 33 | NUMBER 4

The Journal of  
**Neuropsychiatry**  
and Clinical Neurosciences

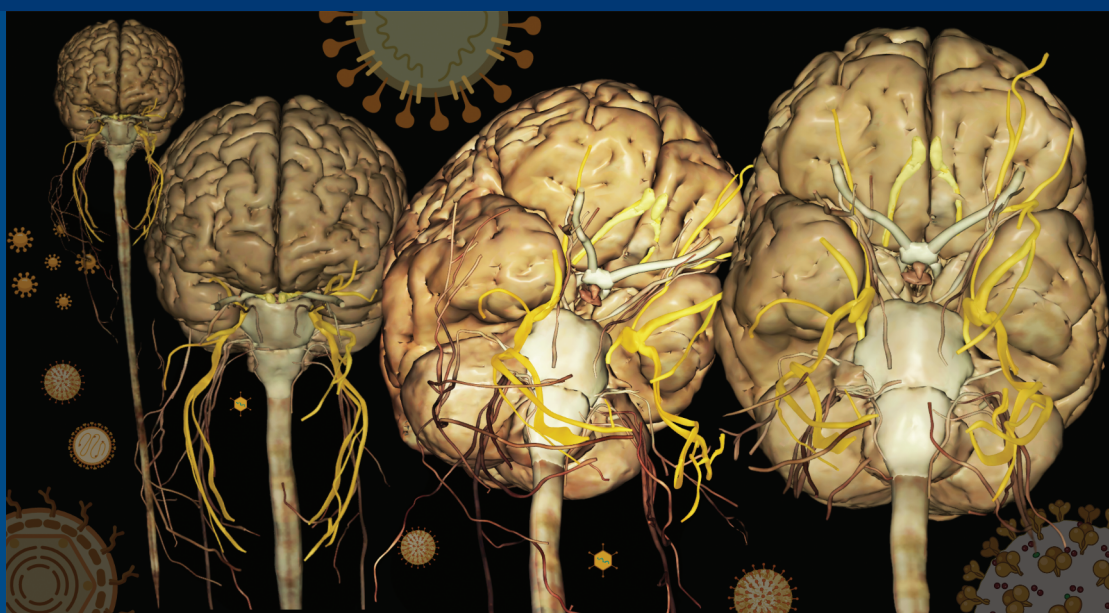

COVID-19 Infection: A Neuropsychiatric Perspective

Anxiety in Parkinson's Disease: A Systematic Review  
of Neuroimaging Studies

Elevated Mood States in Patients With Parkinson's Disease  
Treated With Deep Brain Stimulation:  
Diagnosis and Management Strategies

Resting-State Correlations of Fatigue Following  
Military Deployment

Cognitive Dysfunction in White Matter Disorders:  
New Perspectives in Treatment and Recovery

Official Journal of the American Neuropsychiatric Association  
[neuro.psychiatryonline.org](http://neuro.psychiatryonline.org)
